# Supplementary material for: MFSPSSMpred: identifying short disorder-to-order binding regions in disordered proteins based on contextual local evolutionary conservation
Source: PubMed Central journal article supplement (PMC3853019; doi:10.1186/1471-2105-14-300), 2013-10-04
Supplement: 1471-2105-14-300-S1.pdf [file 1471-2105-14-300-S1.pdf]

### The TESTMem64 dataset

|    | Uniprot Accession<br>(MoRF-containing protein) | MoRF's<br>length | MoRF's start<br>(in Uniprot) | MoRF's end<br>(in Uniprot) | MoRF's Secondary<br>structure type | Uniprot Accession<br>(Partner) |
|----|------------------------------------------------|------------------|------------------------------|----------------------------|------------------------------------|--------------------------------|
| 1  | P01892                                         | 15               | 127                          | 141                        | i-MoRF                             | P01903                         |
|    |                                                |                  |                              |                            |                                    | P04229                         |
| 2  | P05504                                         | 13               | 29                           | 41                         | i-MoRF                             | P16391                         |
| 3  | Q14118                                         | 15               | 881                          | 895                        | i-MoRF                             | P11532                         |
| 4  | P25942                                         | 20               | 247                          | 266                        | i-MoRF                             | Q13114                         |
| 5  | P16410                                         | 11               | 197                          | 207                        | i-MoRF                             | Q96CW1                         |
| 6  | P16109                                         | 18               | 813                          | 830                        | i-MoRF                             | P84092                         |
| 7  | P07204                                         | 19               | 426                          | 444                        | i-MoRF                             | P00734                         |
| 8  | P35330                                         | 16               | 253                          | 268                        | i-MoRF                             | P26043                         |
| 9  | P20645                                         | 13               | 265                          | 277                        | i-MoRF                             | Q9NZ52                         |
| 10 | Q13291                                         | 11               | 276                          | 286                        | i-MoRF                             | O60880                         |
| 11 | P05106                                         | 12               | 765                          | 776                        | i-MoRF                             | P54939                         |
| 12 | Q01590                                         | 10               | 201                          | 210                        | i-MoRF                             | P40482                         |
| 13 | P0A921                                         | 13               | 33                           | 45                         | $\alpha$ -MoRF                     | P0A921                         |
| 14 | P36941                                         | 24               | 385                          | 408                        | i-MoRF                             | Q13114                         |
| 15 | P56817                                         | 12               | 490                          | 501                        | i-MoRF                             | Q9UJY5                         |
| 16 | P11362                                         | 22               | 409                          | 430                        | i-MoRF                             | Q8WU20                         |
| 17 | O15162                                         | 10               | 257                          | 266                        | i-MoRF                             | P52293                         |
| 18 | P31431                                         | 17               | 182                          | 198                        | i-MoRF                             | O00560                         |
| 19 | P51577                                         | 10               | 375                          | 384                        | i-MoRF                             | P84092                         |
| 20 | P15702                                         | 20               | 272                          | 291                        | i-MoRF                             | P26043                         |
| 21 | Q62170                                         | 18               | 331                          | 348                        | i-MoRF                             | P26043                         |
| 22 | P20781                                         | 13               | 420                          | 432                        | i-MoRF                             | Q03555                         |
| 23 | P05880                                         | 13               | 662                          | 674                        | $\alpha$ -MoRF                     | -                              |
| 24 | P14416                                         | 19               | 208                          | 226                        | i-MoRF                             | P63096                         |
| 25 | Q05586                                         | 24               | 875                          | 898                        | $\alpha$ -MoRF                     | P62161                         |
| 26 | P55284                                         | 16               | 769                          | 784                        | i-MoRF                             | Q99NH2                         |
| 27 | P46097                                         | 21               | 40                           | 60                         | $\alpha$ -MoRF                     | P10844                         |
| 28 | P11836                                         | 25               | 163                          | 187                        | complex-MoRF                       | -                              |
| 29 | P18508                                         | 10               | 400                          | 409                        | i-MoRF                             | P84092                         |
| 30 | O08675                                         | 13               | 44                           | 56                         | i-MoRF                             | P19221                         |
| 31 | P21802                                         | 15               | 764                          | 778                        | i-MoRF                             | P21802                         |
| 32 | P05106                                         | 12               | 50                           | 61                         | i-MoRF                             | P01903                         |
|    |                                                |                  |                              |                            |                                    | P79483                         |
| 33 | Q61391                                         | 22               | 2                            | 23                         | $\beta$ -MoRF                      | P26043                         |

|    |        |    |     |     |                |        |
|----|--------|----|-----|-----|----------------|--------|
| 34 | P15379 | 20 | 708 | 727 | $\beta$ -MoRF  | P26043 |
| 35 | P05067 | 10 | 586 | 595 | i-MoRF         | P08253 |
| 36 | P01730 | 23 | 428 | 450 | $\alpha$ -MoRF | Q05397 |
| 37 | Q9BY67 | 12 | 400 | 411 | i-MoRF         | Q9Y2J2 |
| 38 | Q7SVL4 | 11 | 654 | 664 | i-MoRF         | -      |
| 39 | Q5S532 | 13 | 649 | 661 | i-MoRF         | -      |
| 40 | P08138 | 17 | 396 | 412 | $\alpha$ -MoRF | P62158 |
| 41 | Q99523 | 13 | 819 | 831 | i-MoRF         | Q9UJY5 |
| 42 | P48050 | 10 | 436 | 445 | i-MoRF         | O14907 |
| 43 | P18011 | 22 | 51  | 72  | i-MoRF         | P0A2U4 |
| 44 | P03524 | 13 | 512 | 524 | i-MoRF         | P29074 |
| 45 | P61014 | 15 | 4   | 18  | i-MoRF         | P05132 |
|    |        |    |     |     |                | P05132 |
| 46 | Q9Y696 | 10 | 198 | 207 | i-MoRF         | P52293 |
| 47 | P04233 | 19 | 102 | 120 | i-MoRF         | P01903 |
|    |        |    |     |     |                | P04229 |
| 48 | Q9NRQ2 | 13 | 271 | 283 | i-MoRF         | P52293 |
| 49 | P01130 | 14 | 817 | 832 | i-MoRF         | D3ZAR1 |
| 50 | Q9UKV5 | 19 | 622 | 640 | $\alpha$ -MoRF | P55072 |
| 51 | P06974 | 16 | 1   | 16  | $\alpha$ -MoRF | P0AE67 |
| 52 | P02686 | 13 | 221 | 233 | $\alpha$ -MoRF | P01903 |
|    |        |    |     |     |                | Q30154 |
|    |        |    |     |     |                | P0C0I5 |
| 53 | P40338 | 15 | 123 | 137 | i-MoRF         | Q03071 |
| 54 | P49418 | 10 | 322 | 331 | $\alpha$ -MoRF | P17427 |
| 55 | P02686 | 15 | 217 | 231 | i-MoRF         | P01903 |
|    |        |    |     |     |                | P01911 |
|    |        |    |     |     |                | P01848 |
|    |        |    |     |     |                | P01850 |
| 56 | Q811U3 | 10 | 939 | 948 | complex-MoRF   | Q9JIR4 |
| 57 | P0ABB0 | 22 | 1   | 22  | $\alpha$ -MoRF | P0ABA4 |
| 58 | Q9UJY5 | 13 | 376 | 388 | i-MoRF         | Q9UJY5 |
| 59 | Q9BY43 | 13 | 210 | 222 | complex-MoRF   | Q8WUM4 |
| 60 | Q9H444 | 18 | 207 | 224 | $\alpha$ -MoRF | Q8WUM4 |
| 61 | Q96CF2 | 13 | 221 | 233 | i-MoRF         | Q8WUM4 |
| 62 | P03372 | 10 | 298 | 307 | complex-MoRF   | Q8WTS6 |
| 63 | P50552 | 16 | 199 | 214 | i-MoRF         | P07737 |
| 64 | O60331 | 15 | 639 | 653 | i-MoRF         | P62944 |
